# Supplementary material
Source: PubMed Central journal article supplement (PMC10038893)
Supplement: NIHMS1876884-supplement-1.pdf [file NIHMS1876884-supplement-1.pdf]

**Supplementary Table 1.** Definitions of AKI Stage, Resolution of AKI, and Response to Therapy

| AKI subject             | Definition                                                                                                                                                                                                                                                                                                                                                                                                                                                                |
|-------------------------|---------------------------------------------------------------------------------------------------------------------------------------------------------------------------------------------------------------------------------------------------------------------------------------------------------------------------------------------------------------------------------------------------------------------------------------------------------------------------|
| AKI stage               | Stage 1: increase in sCr $\geq 0.3$ mg/dL or an increase in sCr $\geq 1.5$ -fold to 2-fold from baseline <ul style="list-style-type: none"> <li>• 1A: sCr <math>&lt; 1.5</math> mg/dL</li> <li>• 1B: sCr <math>\geq 1.5</math> mg/dL</li> </ul> Stage 2: increase in sCr $> 2$ - to 3-fold from baseline<br>Stage 3: increase of sCr $> 3$ -fold from baseline or sCr $\geq 4.0$ mg/dL with an acute increase $\geq 0.3$ mg/dL or initiation of renal replacement therapy |
| Response to AKI therapy | No response: no regression of AKI (regression to lower stage)<br>Partial response: regression of AKI stage with a reduction of sCr to $\geq 0.3$ mg/dL above the baseline value<br>Full response: the return of sCr to a value within 0.3 mg/dL of baseline value                                                                                                                                                                                                         |

AKI, acute kidney injury; sCr, serum creatinine.
